## THREE-DIMENSIONAL RECONSTRUCTION OF ANIMAL FLIGHT PATHS AND THE TURNING FLIGHT OF MICROCHIROPTERAN BATS

By J. M. V. RAYNER AND H. D. J. N. ALDRIDGE\*

*Department of Zoology, University of Bristol, Woodland Road, Bristol BS8 1UG, U.K.*

*Accepted 25 February 1985*

### SUMMARY

A method is presented by which a microcomputer is used to reconstruct the structure of a three-dimensional object from images obtained with a pair of non-metric cameras when the images contain the vertices of a cube as test pattern and the camera-object configuration satisfies straightforward geometrical conditions. With a still camera and stroboscopic or repeating flash illumination, or with a ciné camera, this method provides a simple and economic means of recording the flight path and wing movements of a flying animal accurately and reliably. Numerical methods for the further analysis of three-dimensional position data to determine velocity, acceleration, energy and curvature, and to interpolate and to correct for distortion due to inaccurate data records are described. The method is illustrated by analysis of a slow, powered turn of the bat *Plecotus auritus* (L.). Accurate reconstruction of the flight path permits mechanical forces and accelerations acting on the bat during the turn to be estimated: turning speed and radius in a narrow space are restricted by the bat's ability to generate sufficient lift to support the weight in nonlinear level flight.

### INTRODUCTION

Still and ciné-photography have been widely used to investigate the rapid wing and body movements of flying animals. If only a single camera is used, however, the film image is a plane projection of a complex three-dimensional object, and it is rarely possible to obtain more than the most rudimentary three-dimensional information about the structure of the object or its movements in time. To describe body deformation more exactly two approaches have been used: either a geometrical relationship is imposed between parts of the object so that structural information can be gleaned from a single image, or multiple images from non-coincident optical axes are used. In the first approach, a distance (for instance that

\*Present address: Department of Biology, Carleton University, Ottawa, Canada K1S 5B6.

Key words: Flight, bats, manoeuvres, photogrammetry.

between the wingtip and the wingroot) is assumed not to vary, and the method is restricted to animals where this approximation is acceptable: it is unlikely to be appropriate, for instance, in studying slow flight in birds and bats where wing deformation is both substantial and important. The second approach has the disadvantage that experiments with multiple ciné cameras are complex and costly, while with a single camera and a beam-splitting system of mirrors there is inevitable degradation of image quality. The method presented in this paper attempts to avoid some of these problems. Although the method has some similarities with these techniques, it is simplified considerably: the use of non-metric 35 mm cameras and of a geometrically simple test object permits significant economies in cost and in analysis time. In this application to flight manoeuvres in bats, two motorized 35 mm cameras are arranged on approximately perpendicular axes; the shutters of the camera are held open for a suitable length of time, and a sequence of images of the moving animal is obtained on a single frame with a stroboscope or a series of electronic flash units (Fig. 1). Camera configuration and image translation, rotation and magnification are controlled externally by incorporating a test cube in the object: the complete structure of the object can be estimated from the digitized image by a microcomputer algorithm without the need to control or survey the positions and orientation of the cameras or the focal lengths of the lenses, or to employ metric cameras with fiducial marks permitting internal image calibration.

In outline, this approach to flight path analysis owes much to the similar technique with three cameras used by Etienne Marey (1890) in his studies of bird flight; Marey however did not attempt to reconstruct his images numerically. More recently, three-dimensional analyses of flying animals have employed stereo-photogrammetry with still cameras (Pennycuick, 1973; Spedding, 1982; Major & Dill, 1978; Spedding, Rayner & Pennycuick, 1984; Biesel, Butz & Nachtigall in Nachtigall, 1984) or have used either two ciné cameras or one ciné camera with an arrangement of mirrors to show multiple views (Magnan, Perriliat-Botonet & Girerd, 1938; Bilo, 1971, 1972; Norberg, 1976; Zarnack, 1977; Buelthoff, Poggio & Wehrhahn, 1980; Trappe, 1982; Wehrhahn, Poggio & Bülthoff, 1982; Zeil, 1983; Dahman & Zeil, 1984). Greenewalt (1955) analysed movements using a single still camera with a stroboscopic image, but was therefore restricted to analysing straight flights perpendicular to the camera axis.

Our development of this method was inspired by the need for an economical microcomputer-based method of monitoring gross body movements in slow-flying birds and bats; the method has also proved invaluable in quantifying wingbeat geometry and gait patterns in bats (Aldridge, 1985). In this application, the numerical algorithm is used to reconstruct the three-dimensional scene from the images of a moving animal seen by two still cameras, but the method is not restricted either to studies of movement or to the analysis of still photographs; it may also be used to reconstruct complex static images or to analyse movement sequences recorded on ciné film. (It must be pointed out, however, that if a beam-

splitter is used on a single camera it will probably be necessary to adopt more sophisticated photogrammetric techniques for image resection to allow for distortion introduced by the optical configuration.) The method is illustrated by a demonstration of the way in which it has been used to determine accurately the velocity and acceleration patterns and the forces acting during a slow powered turn by a small bat; these results have enabled us to clarify the mechanical constraints on turning performance and manoeuvrability in flying animals.

#### OBJECT RECONSTRUCTION BY RESECTION

Various numerical algorithms are available for the three-dimensional reconstruction (*resection*) of an object viewed as a pair of images, each containing a number of points (a test pattern) whose real locations may or may not be known. These methods generally use least-squares error minimization, frequently combined with iterative convergence (Wolf, 1983). The resection problem has two phases, the first being to use the test pattern to relate the position of the camera(s) to a known reference frame, and the second to obtain the spatial coordinates of points visible in both images. The resection of a single view with a known (surveyed) test pattern comprising at least three points has been outlined by Wolf (1983) and Dahmen & Zeil (1984). With two cameras, the camera positions may be reconstructed by iteration if five points are visible in each image, while if eight points are visible, a solution by linear simultaneous equations is possible (Longuet-Higgins, 1981). However, in our experience these methods suffer from major limitations when implemented on a microcomputer; in particular they make excessive demands on memory size, and can require the manipulation of a large, sparse matrix, a process which – despite the development of various sophisticated numerical techniques – can be highly sensitive to the numerical errors inherent in the use of microcomputers, and which can make the entire calculation unreliable.

We have therefore derived a method which is fully practicable on a microcomputer, and which avoids these numerical problems by using the vertices of a cube of known size as test pattern. From the cube image the camera position may be estimated by classical geometric methods [the resection *cannot* be solved by Longuet-Higgins's (1981) matrix method]. This approach has the additional important advantages that the camera and lenses need not be calibrated since the cube allows all image reconstruction to be performed *externally* to the cameras, and that since the resection is computed independently for the two images the cameras and lenses used need not match. Ideally the cube should be large enough so that its image fills the film frame in each camera. The most severe limitation on the geometry is imposed by the simplifications adopted here for the cube resection: the camera axes should be close to perpendicular to the cube faces, and the principal axis (line of sight) of each camera should pass close to the cube centre; in each case the discrepancy should not exceed  $10^\circ$ . If this condition is not met the resection must determine the angular orientation in addition to the

location of the cameras and their line of sight, and more complicated iterative procedures should be used.

### Equipment

The cameras used for these experiments were Nikon F2, FM and FM2 with motor drives and 55 mm f2.8 and f3.5 Micro-Nikkor lenses; these lenses are particularly free from distortion (Spedding, 1982). Illumination was provided by one or two Dawe model 1203C 'Strobosun' stroboscopes, each producing 40 W output at flash rates between 10 and 200 Hz. The cameras were usually configured so that as the bat flew level along the  $\hat{y}$  axis, the cameras viewed normal to the flight path along the  $\hat{x}$  and  $\hat{z}$  axes: the geometry and other features of the turning flight experiment are shown in Fig. 1.

The images were analysed on a Research Machines 380Z microcomputer with 56 kbytes memory, running a standard version of BASIC (RML version 5.0L). Data were input to the computer through a Summagraphics Bit-Pad One digitizing tablet. The images used varied between projections of slides or negatives, tracings from an enlarger or a *camera lucida*, or photographic prints. Ideally the full area (approx. 0.25 m square) of the tablet should be used to minimize errors, the typical digitizing uncertainty being of the order of 0.25 mm. The computer algorithm corrects each image for scale and orientation, and it is

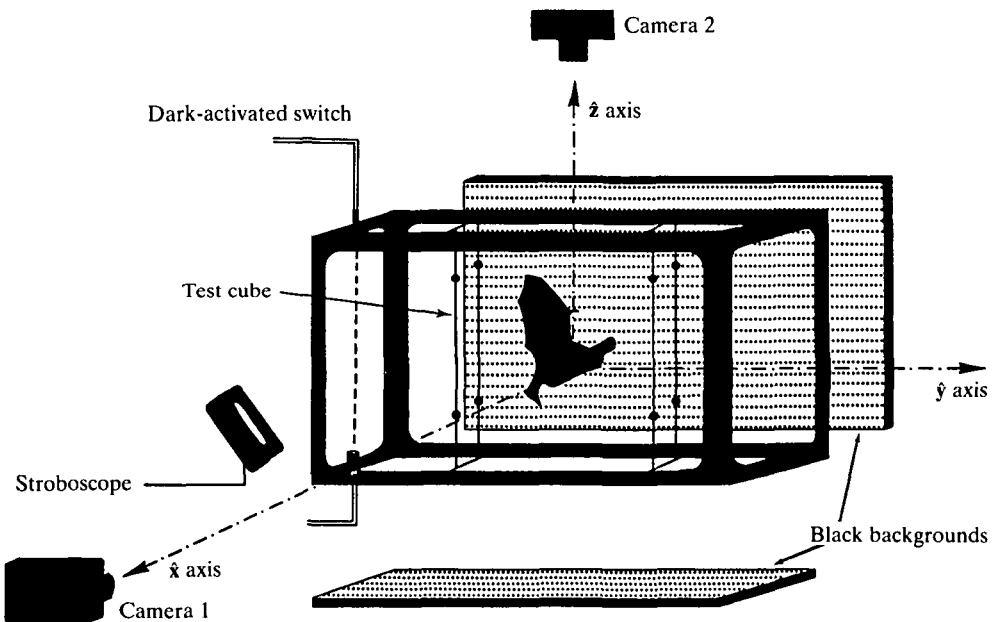

Fig. 1. The experimental configuration. The bat flies through a cage (dimensions 0.91 m  $\times$  0.61 m  $\times$  0.61 m), within which is a test cube (0.4 m side) formed of thin wires. A dark-activated switch opens the camera shutters for approximately 1 s, and the bat is lit – against black backgrounds – by a stroboscope. In the turn analysed the right-hand face of the cube was blocked by a back-lit sheet of Perspex.

necessary to control for rotation or magnification either on the tablet or in preparation of the image. Results were output either on the computer's high-resolution graphics display or on a graph-plotter (Hewlett-Packard 7225A).

Any comparable microcomputer may be used in place of the 380Z; the major requirement is sufficient memory capacity (a minimum of 45 kbytes in addition to the BASIC language) to accommodate the programmes and data; this memory size is sufficient for the analysis of up to about 80 object points. A simplified version of the analysis programme, calculating and displaying velocity and acceleration in *two* dimensions, has also been implemented successfully on Commodore PET 4032 and BBC model B microcomputers.

*The resection algorithm*

The resection is calculated independently for each image, and gives the locations of the cameras together with scale and rotation factors which encompass *all* image translation between the film plane and the computer. The geometry and notation are summarized in Fig. 2. Object coordinates are expressed relative to an origin at the cube centre. In the following description of the resection for a single camera the reference axes are defined so that the camera views parallel to the  $\hat{x}$  axis in the  $-x$  direction; the *principal axis* or line of sight of the camera is assumed

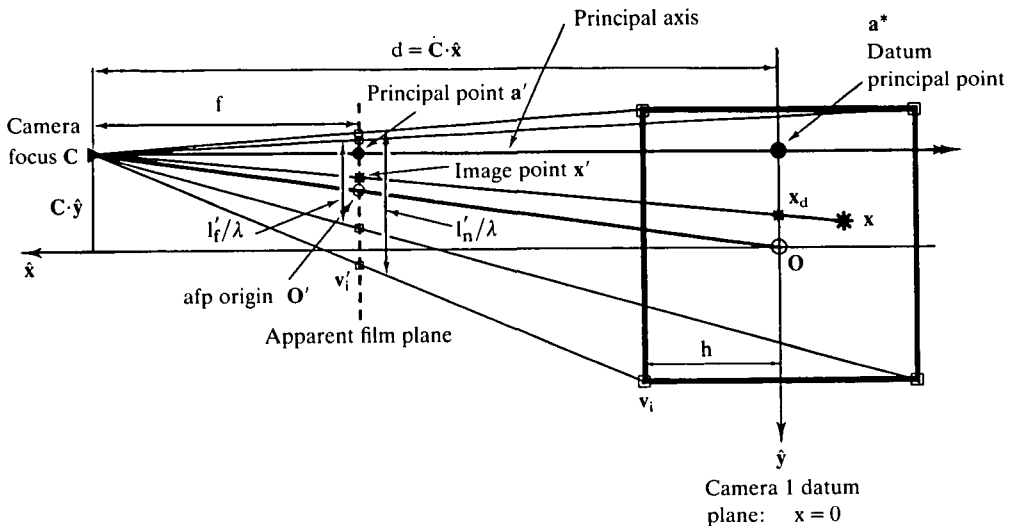

Fig. 2. Geometry and notation for single-camera resection with test cube. Projection onto the  $xy$  plane from the positive  $z$  axis (from above), assuming that  $\hat{x}$  and principal axes coincide. The position,  $f$ , and orientation of the apparent film plane (afp) are defined by the geometry and optics of the camera and by the arrangement of the image on the digitizer. In the apparent film plane - as located by  $f$  - coordinates have the same dimensions as object quantities, but are expressed relative to the estimated image  $O'$  of the cube centre; object coordinates are expressed relative to the cube centre  $O$ . The datum principal point,  $a$ , lies at the intersection of the principal axis and the datum  $x=0$  plane. Object points,  $x$ , within or close to the cube are mapped to image points,  $x'$ , and to datum object points,  $x_d$ . See text for further details and definitions.

to be approximately normal to the  $yz$  faces of the cube, and the camera focus, an object point and its image point in the apparent film plane are assumed to be collinear, so that lens and image distortion are neglected (Wolf, 1983). The  $y$  and  $z$  axes are defined to be perpendicular to the other faces of the cube; the second camera views similarly along one of the other axes, and the same algorithm is used to resect that image with a suitable change of notation. Primed quantities are expressed in digitized or computer coordinates; as the effective focal length is unknown the location of the apparent film plane is arbitrary, and for simplicity is defined so that these primed quantities have the same dimensions as object points. The superscript  $*$  denotes projections of vectors perpendicular to the  $\hat{x}$  axis ( $\mathbf{C}^* = \mathbf{C} - \mathbf{C} \cdot \hat{x} \hat{x}$ ), the  $x$  component being, where necessary, specified independently. Film plane coordinates comprise two components only but the  $*$  is omitted; they are initially expressed relative to an arbitrary origin. The method is intended to take account of distortion of the image due to displacement of the camera location from the  $\hat{x}$  axis; additional sources of error arise if the principal axis is tilted. If the camera-object configuration satisfies simple geometric conditions these errors will be shown to be unimportant; methods by which the effect of tilt can be solved exactly have been given by Wolf (1983), and are not discussed in this paper.

When digitized coordinates of object points have been input to the computer independently for the two images, the solution is obtained by the following manipulations.

(i) Translate all image coordinates by addition of the quantity  $-\sum_i \mathbf{v}'_i$ , where  $\mathbf{v}'_i$  ( $i=1$  to 8) are the images of the cube vertices, so that image coordinates are expressed relative to the estimated image  $\mathbf{O}'$  of the cube centre  $\mathbf{O}$ .

(ii) Rotate the image about the  $\hat{x}$  axis through the new origin so that the mean of the angles between the eight cube edges lying perpendicular to the principal axis and the horizontal or vertical (as appropriate) is zero. This is the simplest means of orienting the digitized image, and – despite distortion introduced at this stage if the principal axis is tilted – has proved sufficiently robust. In all following calculations the image points are assumed to have been translated and rotated in this way.

(iii) Obtain the distance,  $d$ , between the camera and the cube centre from the magnification of characteristic lengths  $l'_n$  and  $l'_f$  on the images of the near and far faces of the cube. To minimize errors the length must be the same on both faces, and should intersect with the principal axis; since initially this point is unknown the length is chosen first to be the mean of the two diagonals. By similar triangles, the  $x$  coordinate of the camera position is then given by:

$$d = \mathbf{C} \cdot \hat{x} = h(l'_n + l'_f) / (l'_n - l'_f), \quad (1)$$

and the location of the apparent film plane is obtained as:

$$f = l'_n l'_f / [(l'_n - l'_f) \lambda], \quad (2)$$

where  $2\lambda h$  is the characteristic length ( $\lambda = \sqrt{2}$  when this is the mean face

diagonal). In view of the presence of the term  $l'_n - l'_f$  in the denominator, this estimate of  $f$  is particularly sensitive to digitizing errors if the camera is far from the cube or if there is substantial foreshortening. However, we have obtained acceptable results using 35 mm lenses with focal lengths as long as 200 mm provided that the cube image is as large as the size of the negative allows. The camera position,  $d$ , and the scale,  $f$ , obtained in this way are independent of image translation and orientation.

(iv) Estimate the displacement  $\mathbf{C}^*$  of the camera focus and principal axis from the  $x$  axis, assuming that the axes are parallel and the displacement is small, from the formula:

$$\mathbf{C}^* = (d^2 - h^2)(\mathbf{c}'_f - \mathbf{c}'_n) / 2fh, \tag{3}$$

where  $\mathbf{c}'_f$  and  $\mathbf{c}'_n$  are the images of the centres of the far and near faces of the cube, obtained as the means of the images of four relevant vertices  $\mathbf{v}'$ . The image principal point  $\mathbf{a}'$  must be known in order to control for translation and rotation in the film plane, and is obtained similarly as:

$$\mathbf{a}' = (\mathbf{c}'_f - \mathbf{c}'_n)d / 2h. \tag{4}$$

In deriving these formulae we have assumed that the camera lies close to the  $\hat{\mathbf{x}}$  axis, and that the angle between the principal axis and the  $\hat{\mathbf{x}}$  axis is small. If the axes are parallel the calculation is exact if the characteristic lengths used in step (iii) meet the principal axis; initially, the locations of the principal points are unknown, and an iterative solution can be obtained by redefining the lengths so that they intersect the *estimated* principal axis, returning to step (iii), and cycling until the scale factors and the image principal point do not change. (If the principal axis is significantly tilted, a more complex iteration may be necessary; the method is outlined by Wolf, 1983.) In practice, however, iteration of either form has proved unnecessary even if  $|\mathbf{C}^*|$  is comparable to  $h$ , provided that the camera is sufficiently far from the cube and the tilt of the principal axis is less than  $10^\circ$ : in this situation iteration will improve resection of the camera configuration but will not materially increase the overall accuracy of reconstruction of known object points.

(v) The camera position and the apparent magnification are now known. It is helpful to scale (or *rectify*) the apparent film plane coordinates  $\mathbf{x}'$  of any object point  $\mathbf{x}$  to those of a corresponding datum point on the  $\mathbf{x}_d$  on the  $x=0$  plane, given by the relations:

$$\mathbf{x}_d^* = d(\mathbf{x}' - \mathbf{a}') / f + \mathbf{C}^* = (d^2\mathbf{x}' - h^2\mathbf{a}') / df, \tag{5}$$

and  $\mathbf{x}_d \hat{\mathbf{x}} = 0$ . In this way all coordinates are now expressed in 'real' dimensions.

(vi) The resection process (steps i-v) is then repeated for the second camera (in this application lying along the  $\hat{\mathbf{z}}$  axis).

*Object point reconstruction by collinearity*

Resection has now determined the camera focus positions  $\mathbf{C}_1$  and  $\mathbf{C}_2$ , and a set of datum points  $\mathbf{x}_{d1}$  and  $\mathbf{x}_{d2}$  (respectively on the  $x=0$  and  $z=0$  planes) for each

object point  $\mathbf{x}$  as viewed by each camera. It is useful to determine at the time of the experiment the camera positions and scaling independently for comparison with values estimated by the resection. Once the camera locations and the datum points are determined no further reference need be made to the experimental configuration.

The location of an object point  $\mathbf{x}$  visible in both images is estimated by solution of the two collinearity equations (Wolf, 1983) specified by the camera foci and the datum points. If the resection process is accurate  $\mathbf{x}$  will lie at the intersection of the lines

$$\mathbf{x}_1 = \mathbf{C}_1 + t_1(\mathbf{x}_{d1} - \mathbf{C}_1) = \mathbf{C}_1 + t_1\mathbf{q}_1 \quad (6a)$$

and

$$\mathbf{x}_2 = \mathbf{C}_2 + t_2(\mathbf{x}_{d2} - \mathbf{C}_2) = \mathbf{C}_2 + t_2\mathbf{q}_2, \quad (6b)$$

and values of  $t_1$  and  $t_2$  must be determined by conventional methods of coordinate geometry. In general these lines do not intersect exactly owing to digitizing errors, and  $\mathbf{x}$  is estimated as the mid-point of the line of their closest approach, that is as

$$\mathbf{x} = [\mathbf{x}_1(t_1) + \mathbf{x}_2(t_2)]/2, \quad (7)$$

where  $t_1$  and  $t_2$  are given by:

$$t_1 = [\mathbf{q}_1 \cdot \mathbf{q}_2 \mathbf{E} \cdot \mathbf{q}_2 - \mathbf{q}_2^2 \mathbf{E} \cdot \mathbf{q}_1] / [\mathbf{q}_1^2 \mathbf{q}_2^2 - (\mathbf{q}_1 \cdot \mathbf{q}_2)^2] \quad (8a)$$

and

$$t_2 = [\mathbf{q}_1^2 \mathbf{E} \cdot \mathbf{q}_2 - \mathbf{q}_1 \cdot \mathbf{q}_2 \mathbf{E} \cdot \mathbf{q}_1] / [\mathbf{q}_1^2 \mathbf{q}_2^2 - (\mathbf{q}_1 \cdot \mathbf{q}_2)^2], \quad (8b)$$

and  $\mathbf{E} = \mathbf{C}_1 - \mathbf{C}_2$ . This calculation is performed in turn for each image point, including the cube vertices. When the image consists of superimposed views corresponding to different times, the time information may be incorporated in the analysis at this stage.

#### *Accuracy and errors*

The performance of this resection and reconstruction method can be influenced by errors of two distinct types, the first due to performance of the resection algorithm, and the second to digitizing errors, to inaccuracies in construction of the test cube, to optical distortion (which we have assumed to be small) and to imprecision in determining the image locations to be digitized.

Resection errors have been assessed by analytical expansion of the formulae derived above and by computer simulation; as might be expected, errors are due largely to tilt of the principal axis. If the camera axis is normal to, but offset from, the cube centre with  $|\mathbf{C}^*| < h$ , object points within or on the cube are reconstructed without iteration to an empirical accuracy of better than  $0.25|\mathbf{C}^*|^2 h/d^2$ , and these errors can be eliminated entirely if iteration is used. With the principal axis of one camera tilted through a small angle  $\theta$ , the leading term of the error in estimation of datum points  $\mathbf{x}_d$  is  $\theta|\mathbf{x}|^2/dh$ , but the *overall* accuracy of object



point reconstruction is rather better than this, the maximum error being found empirically to behave as  $3.5\theta h^{2.5}/d^{1.5}$  at the edges of the cube; the error decreases considerably towards the principal axis. The majority of the distortion due to tilt has the effect of contracting or dilating the image in a plane normal to the tilt: for instance, if the principal axis of one camera is tilted from the  $\hat{x}$  axis in the  $xy$  plane through angle  $\theta$  towards the  $+\hat{y}$  axis, then the  $z$  coordinate of a point  $\mathbf{x}=(x,y,z)$  within the cube is overestimated by  $-\theta yz/d$ , but the  $x$  and  $y$  coordinates are accurate to within order of magnitude  $\theta^2 h^3/d^2$ . Accordingly, in a typical experimental configuration with  $d=5h$  and with the relatively large tilt angle  $\theta=5^\circ$ , the maximum error expected due to resection limitations is approximately  $0.017h$ , or  $0.0035$  m with a cube of side  $0.4$  m.

The *overall* performance of the experiments has been assessed by analysing a series of photographs of a test object comprising the resection cube together with a number of known test locations within, on and outside the cube. Dahmen & Zeil (1984) have suggested that the positional error in  $\mathbf{x}$  can be estimated by the length  $\varepsilon=(1/2)|\mathbf{x}_1-\mathbf{x}_2|$  (cf. equations 6a, 6b). Although this quantity forms a useful *ad hoc* estimate of object point errors, it does *not* measure the whole error and should be used with care. For instance, if either or both cameras are tilted within the plane of the two *ideal* camera axes, then for all points on that plane  $\varepsilon$  is zero, even though the resection may be wildly inaccurate if  $\theta h/d$  is at all large. Accordingly, we have preferred to assess the method by the overall reconstruction performance of the test object, which was photographed with different lenses from a range of positions and tilt angles. With moderate care in setting up the configuration, and with  $\theta h/d$  within  $0.02$  and  $|\mathbf{C}^*|<0.5h$ , the maximum overall error – including the influence of cube construction, resection and digitizing inaccuracy – obtained for the cube vertices in successive experimental trials was  $0.03h$ . The cube centre and the centres of the  $xz$  faces were reconstructed consistently to within  $0.015h$ , with no apparent systematic variation within the cube. There was no apparent bias according to camera location, and with a cube edge of  $0.4$  m the maximum absolute error was  $0.007$  m for an object point lying within the cube and close to the  $\hat{y}$  axis. On the scale of a bat of at least  $0.2$  m wingspan, we consider this degree of accuracy fully acceptable, particularly since much of this error is due to digitizing inaccuracies and is therefore random, and may be treated by the methods given below. The procedure is least reliable along the edge of the cube closest to both cameras, since here solutions of the collinearity equations are least accurate, but within a radius of  $2h$  from the cube centre reconstruction of the position of *known* object points was accurate to within  $0.04h$ . Within the cube, resection errors of the order  $\theta h/d$  are comparable to the other sources of error; we consider the method to be fully acceptable provided that  $\theta h/d$  is less than  $0.02$ . In practice, there is little problem in constructing an accurate test cube, and with the cube and a spirit level or plumb line tilt angles of  $1$  or  $2^\circ$  are easy to achieve. More complex photogrammetric methods can increase significantly the accuracy of resection, but the technique proposed here has the great advantage of simplicity, and in practice its accuracy is limited as much by the resolution of the

film negatives and of the digitizing tablet and its user as it is by the simplifying geometric assumptions which this resection method adopts.

#### IMAGE ANALYSIS: ESTIMATION OF FLIGHT PATH DYNAMICS

The second phase of the analysis of flight paths comprises the estimation of velocity and acceleration and of other geometrical and mechanical quantities for the moving animal. These remarks are presented in the context of space resection with time information obtained by stroboscopic lighting, but they apply equally to the analysis of time series of position data obtained by any means. We consider it helpful to summarize here methods and formulae for the analysis of position data, some of which are otherwise not readily available. In all of these techniques, the vector components of position are treated independently. We consider a time series consisting of  $n$  position records,  $p_i$ , obtained empirically at equal time interval  $\tau$ .

#### *Smoothing*

Biomechanical data sequences are frequently noisy as a result of recording imprecision and of numerical errors in analysis. Position traces may be *visually* acceptable, but still random errors may be such that calculated velocity and acceleration traces (see below) are so erratic as to be meaningless. A common requirement is therefore to smooth the position series in order to reduce the effect of these random measurement errors to improve the estimates of velocity and acceleration. Many smoothing methods have been proposed, including least squares fitting of polynomials (Lanczos, 1957; Bevington, 1969), spline functions (Wood & Jennings, 1979) and Fourier analysis (Lanczos, 1957; Hatze, 1981). However, *all* smoothing techniques involve assumptions about the nature and time variation of the position series, and they should be used with great care (Bevington, 1969). Probably the most appropriate method for animal flight paths is fourth-difference smoothing, in which a parabola is fitted locally to five adjacent data points (Lanczos, 1957); this method is founded on the sensible assumption that *acceleration – and therefore force – is piecewise constant in time*. The third and fourth differences  $\Delta^3 p$  and  $\Delta^4 p$  are calculated in a difference table ( $\Delta_i^n = \Delta_{i+1/2}^{n-1} - \Delta_{i-1/2}^{n-1}$ ), and the smoothed estimate of position is given by

$$p'_i = p_i - 3\Delta^4 p_i / 35; \quad (9)$$

at the extremes of the sequence the smoothing formulae are

$$p'_1 = p_1 + \Delta^3 p_{5/2} / 5 + 3\Delta^4 p_3 / 35, \quad (10a)$$

$$p'_2 = p_2 - 2\Delta^3 p_{5/2} / 5 - \Delta^4 p_3 / 7, \quad (10b)$$

$$p'_{n-1} = p_{n-1} + 2\Delta^3 p_{n-3/2} / 5 - \Delta^4 p_{n-2} / 7, \quad (10c)$$

and

$$p'_n = p_n - \Delta^3 p_{n-3/2} / 5 + 3\Delta^4 p_{n-2} / 35. \quad (10d)$$

If acceleration changes rapidly during the sampling intervals these corrections may be too harsh and may destroy significant variation, but then the only means of improving velocity and acceleration estimates is to increase the time resolution by using a higher sampling rate.

#### *Velocity, acceleration and energy*

The most important object of analysis of a position series is generally the estimation of velocity  $u_i$  and acceleration  $a_i$ . There are various methods for numerical differentiation of empirical data, and *it is essential to allow for errors in the position series*: methods for the differentiation of an exact tabulated function do not do this and *are not appropriate*. The most suitable method for first-order empirical differentiation is – as in the smoothing problem – to assume that acceleration is piecewise constant, and to model position locally by a parabola (Lanczos, 1957). (Differentiation of a spline function or a Lagrange polynomial modelling position is not recommended as these curves are too sensitive to errors in individual records, but Fourier methods can also be valuable – see below.) With the local parabolic approximation, velocity is estimated by the formula

$$u_i = (-2p_{i-2} - p_{i-1} + p_{i+1} + 2p_{i+2}) / 10\tau; \quad (11)$$

thus for an empirical position series velocity  $u_i$  is independent of the contemporaneous position  $p_i$ . At the end points the velocity is estimated as

$$u_1 = (-21p_1 + 13p_2 + 17p_3 - 9p_4) / 20\tau, \quad (12a)$$

$$u_2 = (-11p_1 + 3p_2 + 7p_3 + p_4) / 20\tau, \quad (12b)$$

$$u_{n-1} = -(-11p_n + 3p_{n-1} + 7p_{n-2} + p_{n-3}) / 20\tau, \quad (12c)$$

and

$$u_{n-2} = -(-21p_n + 13p_{n-1} + 17p_{n-2} - 9p_{n-3}) / 20\tau. \quad (12d)$$

Acceleration is estimated by the same method, assuming now that *rate of change of acceleration* is locally constant. The absolute accuracy with which velocity and acceleration may be determined, and the resolution of any rapid variations, depend on the frequency of sampling; the sampling interval  $\tau$  materially affects interpretation of movements, particularly when displacements are cyclic (Ward & Humphreys, 1981), and ideally  $\tau$  should be made as small as possible. With stroboscopic lighting in our application the limit was imposed by the quantity of light delivered by each flash and by the ease of distinguishing overlapping images on the photographs (which is related to flight speed and behaviour), and the maximum practicable flash rate was about 200 Hz.

Even though smoothing and the use of the least-squares parabola make sensible allowance for random errors in the position trace, it is still common for small-amplitude noise in position to be amplified and to distort the acceleration trace substantially and to render it useless. An alternative technique is provided by the Fourier series method of Lanczos (1957) and Hatze (1981), in which the position

sequence is replaced by a Fourier expansion, and a cut-off frequency is determined to smooth the curve; the Fourier series is then differentiated either algebraically or empirically. However, this method demands that acceleration must be identically zero at the start and finish of the trace since this is an unavoidable feature of the position series. If the initial acceleration is arbitrary – as it must be in a brief segment of a flight path – we know of no more reliable method for the numerical differentiation of an empirical position series than the least-squares parabola.

From vector position and velocity traces  $\mathbf{p}_i$  and  $\mathbf{u}_i$  it can be helpful to consider the total specific energy (kinetic and potential energy per unit mass), which is found as

$$e_i = \mathbf{g}\mathbf{p}_i \cdot \hat{\mathbf{z}} + (1/2)|\mathbf{u}_i|^2, \quad (13)$$

where  $\mathbf{g} = 9.81 \text{ m s}^{-2}$  is the acceleration of gravity.

#### *Curvature*

The rate of deformation of the flight path gives a useful guide to an animal's manoeuvrability, and is most simply quantified by the *curvature*. (Curvature is used in preference to *radius of curvature* since it is zero rather than infinite when the animal is flying straight.) Curvature is a vector quantity, but its scalar component  $\kappa$  in the xy plane is the most important measure of performance in a level turn, and is calculated as

$$\kappa = (u_x a_y - u_y a_x) / (u_x^2 + u_y^2)^{3/2}, \quad (14)$$

where subscripts x and y denote the components of linear velocity and acceleration. When the acceleration trace is erratic  $\kappa$  may be unreliable, and may alternatively be estimated by assuming that the second derivative of curvature is piecewise constant and fitting an appropriate parabola to x and y position traces. The rate of change of curvature is indicative of rolling performance and agility (rate of performing manoeuvres), and is estimated by differentiating the  $\kappa_i$  data series as in equations (11) and (12).

#### *Interpolation*

It is often necessary to estimate values at times intermediate to the sample intervals in order to draw a smooth curve, to locate a local maximum or minimum, or to estimate a value at a specified time. The simplest methods are the four- and five-point Lagrange polynomials, which fit cubic or quartic polynomials to points surrounding the interval. The appropriate formulae are widely cited (see, for example, Lanczos, 1957).

If a data record is missing or is unreliable, a sampling point may be interpolated by the formulae

$$p_i = (-p_{i-2} + 4p_{i-1} + 4p_{i+1} - p_{i+2}) / 6, \quad (15a)$$

$$p_1 = 3p_2 - 3p_3 + p_4, \quad (15b)$$

$$p_2 = (p_1 + 3p_3 - p_4) / 3 \quad (15c)$$

(and similarly for  $p_{n-1}$  and  $p_n$ ), which are derived by fitting a polynomial exactly through four surrounding points.

#### TURNING FLIGHT OF THE BAT *PLECOTUS AURITUS*

Full descriptions of the application of this technique to bird and bat flight will be published elsewhere (see, for example, Aldridge 1985). As an illustration of resection and path analysis methods a brief description is given here of the configuration of the flight path during a single, slow, powered turn of a long-eared bat *Plecotus auritus* (Vespertilionidae; body mass  $m = 0.0095$  kg, wingspan 0.255 m), based on photographs taken in captivity in a flight cage (Fig. 1). The animal approached the test cube from the  $-\hat{y}$  direction; its exit was blocked by a back-lit Perspex sheet on the plane  $y = 0.4$  m, and the bat turned within the cube through almost  $180^\circ$  (while flapping its wings) before flying off in approximately the  $-\hat{y}$  direction (Fig. 3). The turn was slow and gradual, as usual in powered turns of small microbats, and is representative of many which we have filmed and analysed using this technique. The bat was accustomed to the cage and the obstacle, and habitually responded with a turn of this kind. The flash rate of 20.0 Hz was not sufficiently large for the wingbeat frequency to be distinguished, and only the mid-point of the line between the two humeral joints was digitized; this point could be readily identified in all images without the need for artificial markers on the bat. In straight flight in this individual the wingbeat frequency was approximately 14 Hz, but in the turn it rose to between 16 and 18 Hz owing to the fall in air speed (compare Aldridge, 1985).

Parallel projections of the flight path onto the three coordinate planes are shown in Fig. 4, and traces of position, velocity, acceleration and energy against time in Fig. 5. Curves are drawn by interpolating at four points within each interval with a five-point Lagrange polynomial; this curve is not a spline function and the gradient is discontinuous at the data points, but it is adequate to indicate the trend of variation. In this particular pair of photographs the camera axis tilts were both less than  $2^\circ$ , and the reconstruction error of points at the edges of the cube was estimated to be less than 0.002 m; systematic linear variation in this error across the cube due to principal axis tilt is estimated to affect velocity and acceleration estimates by at most 2%; random error could be eliminated by smoothing, but in this case this proved unnecessary.

At the start of the turn the bat was flying straight ( $\mathbf{v} \cdot \hat{\mathbf{x}} = 0$ ) and slowly ( $1.60 \text{ ms}^{-1}$ ); curvature (Fig. 6) developed gradually, and the animal decelerated during the turn to a minimum speed of  $0.55 \text{ ms}^{-1}$  when the curvature was sharpest. In order to minimize the loss of mechanical energy, the bat gained height as it slowed during the approach. Throughout the turn the  $y$  component of acceleration was large and constant (approximately  $-4 \text{ ms}^{-2}$ ); speed was still increasing at the end of the sequence, although the animal was descending

A

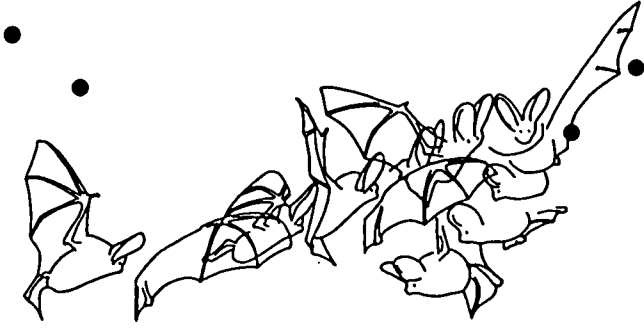

B

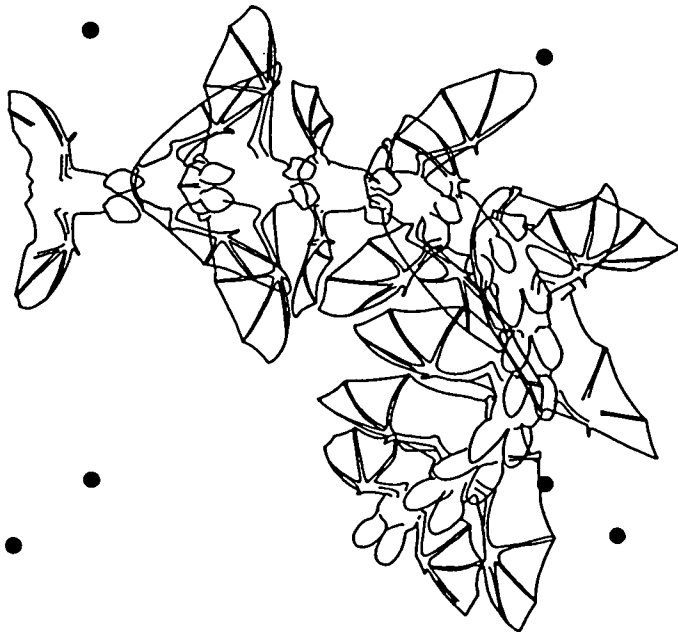

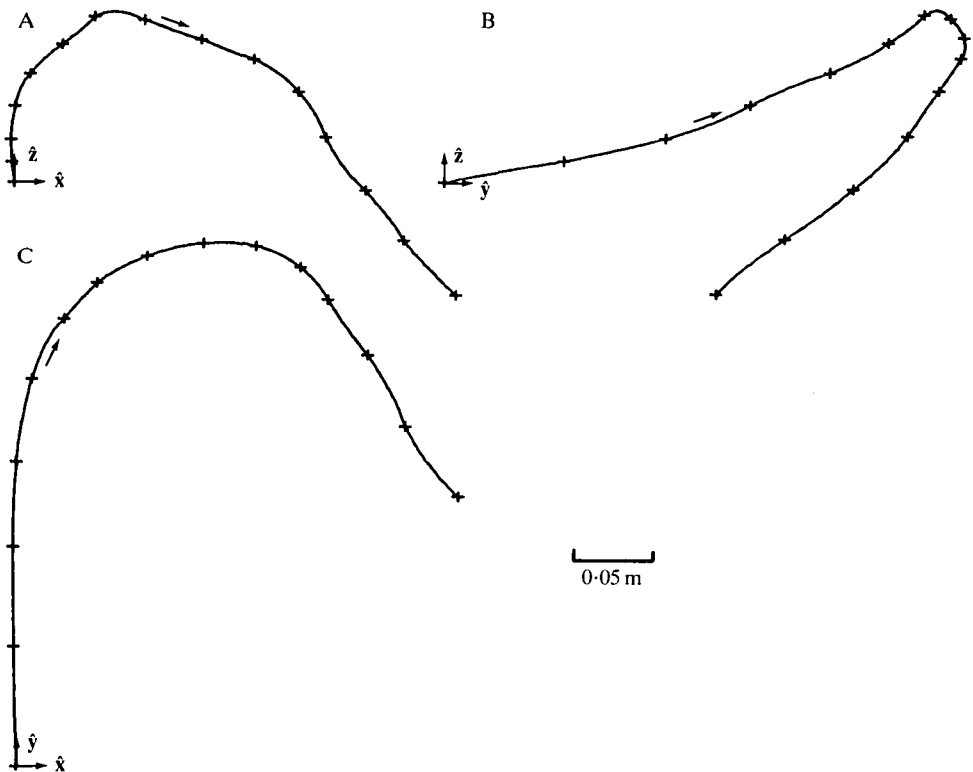

Fig. 4. Parallel projections or rectifications of the flight path during the turn onto (A)  $y=0$ , (B)  $x=0$  and (C)  $z=0$  planes, as reconstructed from the paired photographs in Fig. 3. (B) corresponds to Fig. 3A and (C) to Fig. 3B, with correction for parallax.

sufficiently fast that overall it was *losing* mechanical energy. The minimum radius of curvature between 0.08 and 0.10 m was considerably smaller than the bat's wing semi-span and was maintained for a period of 0.2 s (almost four wingbeats); the rate of change of curvature as the animal banked into the turn was more gradual than during the succeeding recovery, owing to the assistance of gravity while the animal was descending. The vertical acceleration fell rapidly from  $2.0 \text{ m s}^{-1}$  to  $-3.2 \text{ m s}^{-2}$  during the start of the turn, and was negative while the radius of the turn was less than 0.4 m; after the turn it rose up to, and probably at a later stage above, zero as the flight path levelled out. Although the wings generated lift throughout the turn, the negative vertical acceleration reveals that they did not produce sufficient vertical force to support the weight, probably because the wings must be banked to produce the lateral centripetal acceleration required to alter the flight path: this lateral acceleration (calculated as  $\kappa v^2$ ) reached almost

Fig. 3. Tracings from photographs of a long-eared bat *Plecotus auritus* in a shallow powered turn, viewed (A) along  $\hat{x}$  and (B)  $\hat{z}$  axes. This manoeuvre is analysed in the text. The solid circles mark the locations of the cube vertices. Flash rate 20.0 Hz. Cube side  $2h=0.4 \text{ m}$ .

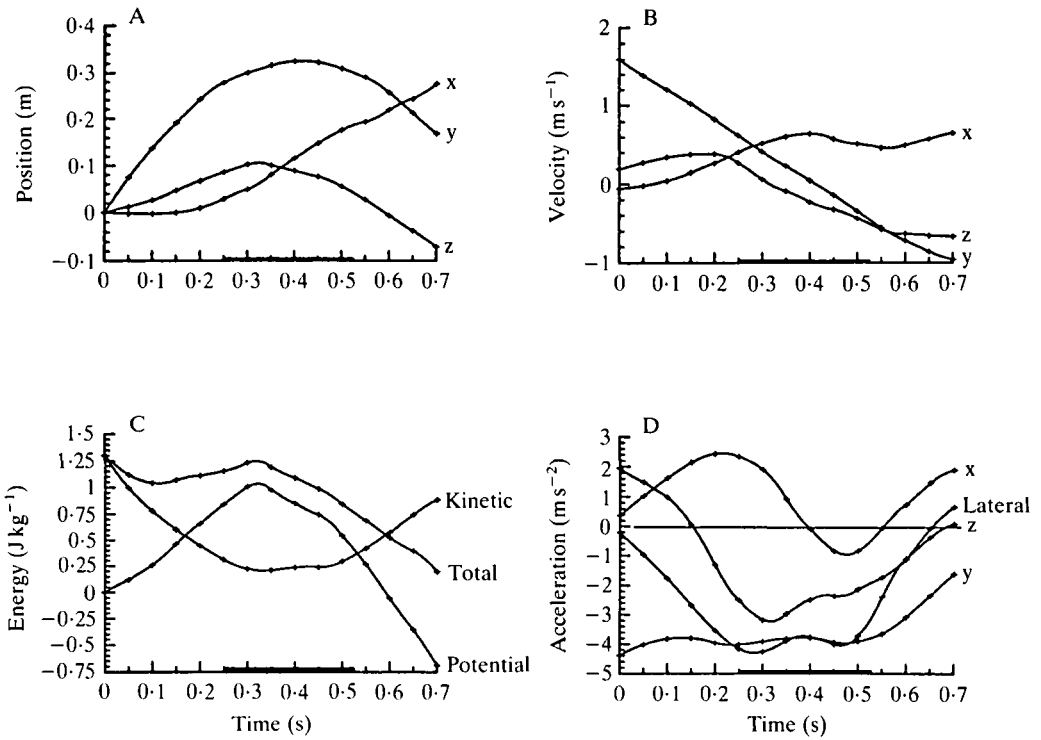

Fig. 5. Position (A), velocity (B), energy per unit body mass (C) and acceleration (D) during the turn. Position and potential energy are expressed relative to the initial position of the bat ( $-0.04$ ,  $-0.18$ ,  $0.07$  m relative to the cube centre). The phase with sharpest curvature is marked by the solid bar on the time axes. Lateral acceleration is the centripetal acceleration in the  $xy$  plane due to the curving flight path, and is calculated as  $\kappa(u_x^2 + u_y^2)$ .

$g/2$  at the middle of the turn. However, during the turn the mean normal lift coefficient (calculated from the vector sum of weight and lateral acceleration and the instantaneous flight speed) did not change greatly, but reached its highest value at the sharpest point of the turn. Our interpretation of this is that at this slow turning speed lateral acceleration is obtained only at the expense of weight support: the total force normal to the flight path never exceeds  $1.10$  mg, and is about  $0.8$  mg during the middle of the turn, and the estimated maximum bank angle of  $32^\circ$  agrees well with body and wing roll visible in Fig. 3A. This constraint on turning performance is probably imposed by circulation generation on the animal's wings, and the bat appears to be flying at (or near) maximum lift coefficient. The approach air speed is slow compared to the normal speeds for straight flight in this cage for this individual ( $1.5$ – $3$   $\text{m s}^{-1}$ ), and if it were able to obtain a higher lift coefficient it is likely that the bat would either not decelerate so much or would climb less steeply, but would turn at similar turning radius with higher speed or would turn more tightly. It seems that the bat cannot improve turning performance by increasing lift coefficient much beyond the value in steady level flight; however the possibility cannot be ruled out that sensory



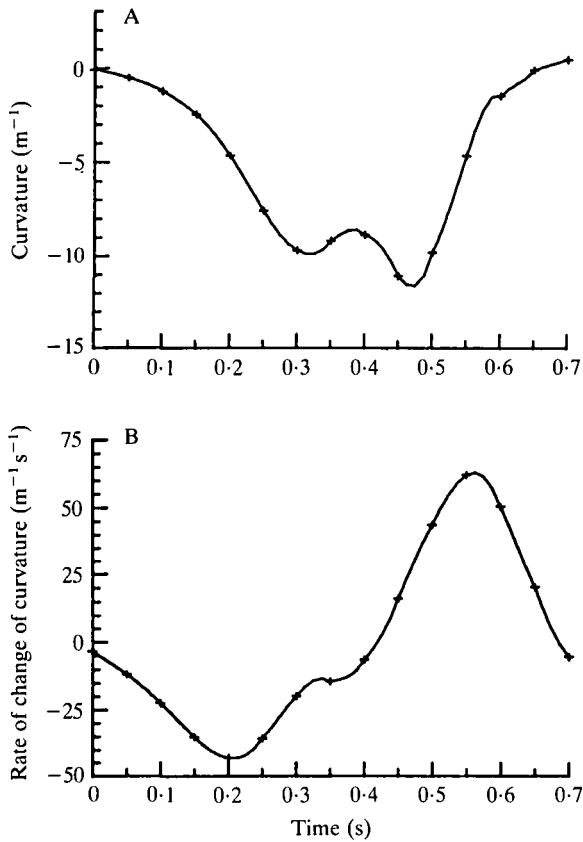

Fig. 6. Curvature (A) and rate of change of curvature (B) in the xy plane. Curvature is negative since the turn is right-handed. The slight hesitation in curvature between 0.35 and 0.40 s may be a numerical artefact and is not fully reflected in the rate of change curve since the differentiation (equation 11) averages over five points. This problem can only be resolved by increasing the sampling rate.

performance and the animal's own experience of the boundaries of the cage also constrain turning ability.

The resection method permits accurate estimation of mechanical forces and accelerations during the turn in a way which would be impossible with normal cinematography. As we have shown, the entire manoeuvre is tightly constrained by mechanical factors: the bat must fly slowly so that the lateral acceleration needed to turn within the cage is not unacceptably large; the cage width is 0.61 m, but the maximum turning diameter is in this case about 0.25 m since the approach flight is close to the centre of the cage. At this curvature the bat is unable to generate sufficient vertical force to support the weight in a level turn in addition to balancing the lateral acceleration: even though it reduces speed considerably to reduce the lateral acceleration and to increase curvature, the animal must still tolerate some loss of height. However, for the short period of the turn the height loss is relatively small, and the bat can offset it by decelerating and using kinetic

energy to gain height during the approach. Surprisingly, maximum elevation is reached at the *start* of the turn rather than at the middle: potential energy is used to maintain and increase speed during the turn in order to offset the loss of thrust from the wings, since lift must be primarily responsible for the normal force during this phase; slight deceleration parallel to the flight path can be distinguished at this stage. In this example excess height is probably lost deliberately after the turn.

A detailed discussion of turning mechanics and a comparative analysis of turning by different species will be presented elsewhere. Similar factors constrain turning performance in other microchiropteran bats: in slow, tight, *powered* turns, animals are limited by their inability to generate sufficient vertical *and lateral* force simultaneously. In this way aerodynamic, mechanical and sensory factors interact to set the maximum turning speed and the minimum radius within which an animal can successfully turn.

#### DISCUSSION

Accurate reconstruction of the flight path and of body movements in three dimensions is essential if the mechanical factors underlying flight performance and manoeuvrability are to be understood. The example of a slow, powered turn in a small bat shows the importance of determining precisely acceleration and flight path geometry in three dimensions in order to explain how the animal is able to turn in a space smaller than its wingspan without overall loss of mechanical energy. The resection method described here is particularly appropriate for such experiments, and has proved extremely robust and tolerant of inaccuracies in the experimental configuration. By employing a test cube with minimum geometrical constraints, it is possible to estimate the camera location and magnification sufficiently accurately to reconstruct a complex object in three dimensions with a single microcomputer. With the added use of a stroboscope the method may be used also to determine velocity, acceleration and curvature of the flight path.

This research was funded by the Science and Engineering Research Council, the Natural Environment Research Council and the Royal Society. The authors wish to thank Dr Geoff Spedding for advice with photogrammetry, and an anonymous referee for some helpful comments.

#### REFERENCES

- ALDRIDGE, H. D. J. N. (1985). The flight kinematics of the greater-horseshoe bat *Rhinolophus ferrumequinum*. In *Biona Report 5, Fledermausflug*, (ed. W. Nachtigall). Heidelberg: Gustav Fischer Verlag (in press).
- BEVINGTON, P. R. (1969). *Data Reduction for the Physical Sciences*. New York: McGraw Hill.
- BILO, D. (1971). Flugbiophysik von Kleinvögeln. I. Kinematik und Aerodynamik des Flügelabschlages beim Haussperling (*Passer domesticus* L.). *Z. vergl. Physiol.* **71**, 382–454.
- BILO, D. (1972). Flugbiophysik von Kleinvögeln. II. Kinematik und Aerodynamik des Flügelauflageschlages beim Haussperling (*Passer domesticus* L.). *Z. vergl. Physiol.* **76**, 426–437.

- BUELTHOFF, H., POGGIO, T. & WEHRHAHN, C. (1980). 3-D analysis of the flight trajectories of flies (*Drosophila melanogaster*). *Z. Naturf.* **35C**, 811–815.
- DAHMEN, H.-J. & ZEIL, J. (1984). Recording and reconstructing three-dimensional trajectories: a versatile method for the field biologist. *Proc. R. Soc. B* **222**, 107–113.
- GREENEWALT, C. H. (1955). The flight of the black-capped chickadee and the white-breasted nuthatch. *Auk* **72**, 1–5.
- HATZE, H. (1981). The use of optimally regularized Fourier series for estimating higher-order derivatives of noisy biomechanical data. *J. Biomech.* **14**, 13–18.
- LANCZOS, C. (1957). *Applied Analysis*. London: Isaac Pitman & Sons.
- LONGUET-HIGGINS, H. C. (1981). A computer algorithm for reconstructing a scene from two projections. *Nature, Lond.* **293**, 133–135.
- MAGNAN, A., PERRILLIAT-BOTONET, C. & GIRERD, H. (1938). Cinématographies simultanées dans trois directions perpendiculaires deux à deux d'un oiseau en vol. *C. r. hebd. Séanc. Acad. Sci. Paris* **206**, 374–377.
- MAJOR, P. F. & DILL, L. M. (1978). The three-dimensional structure of airborne bird flocks. *Behav. Ecol. Sociobiol.* **4**, 111–122.
- MAREY, E. J. (1890). *Physiologie de Mouvement. Le Vol des Oiseaux*. Paris: G. Masson.
- NACHTIGALL, W. (1984). Vogelflugforschung in Deutschland. *J. Orn., Lpz.* **125**, 157–187.
- NORBERG, U. M. (1976). Aerodynamics, kinematics, and energetics of horizontal flapping flight in the long-eared bat *Plecotus auritus*. *J. exp. Biol.* **65**, 179–212.
- PENNYCUICK, C. J. (1973). Wing profile shape in a fruit-bat gliding in a wind tunnel determined by photogrammetry. *Period. Biol.* **75**, 77–82.
- SPEDDING, G. R. (1982). The vortex wake of birds: an experimental investigation. PhD. thesis, University of Bristol.
- SPEDDING, G. R., RAYNER, J. M. V. & PENNYCUICK, C. J. (1984). Momentum and energy in the wake of a pigeon (*Columba livia*) in slow flight. *J. exp. Biol.* **111**, 81–102.
- TRAPPE, M. (1982). Verhalten und Echoortung der grossen Hufeisennase (*Rhinolophus ferrumequinum*) beim Insektenfang. Doctoral dissertation, Eberhard-Karls-University, Tübingen.
- WARD, T. M. & HUMPHREYS, W. F. (1981). The effect of filming speed on the interpretation of arthropod locomotion. *J. exp. Biol.* **92**, 323–331.
- WEHRHAN, C., POGGIO, T. & BÜLTHOFF, H. (1982). Tracking and chasing in houseflies (*Musca*). An analysis of 3-D flight trajectories. *Biol. Cybernetics* **45**, 123–130.
- WOLF, P. R. (1983). *Elements of Photogrammetry* (second edition). New York: McGraw-Hill.
- WOOD, G. A. & JENNINGS, L. S. (1979). On the use of spline functions for data smoothing. *J. Biomech.* **12**, 21–26.
- ZARNACK, W. (1977). A high-speed stereophotograph measuring system for flying animals. *Fortschr. Zool.* **24**, 317–319.
- ZEIL, J. (1983). Sexual dimorphism in the visual system of flies: the free flight behaviour of male Bibionidae (Diptera). *J. comp. Physiol.* **150A**, 395–412.
